# Supplementary material
Source: publisher site journal article supplement (https://www.dovepress.com/article/357566)
Supplement: Supplementary file 2 [file get_supplementary_file.php]

**Table: Checklist for Reporting Results of Internet E-Surveys (CHERRIES)**

| <i>Item Category</i>                                                                        | <i>Checklist Item</i>                    | <i>Study compliance</i>                                                                                                                                                                                                                                      |
|---------------------------------------------------------------------------------------------|------------------------------------------|--------------------------------------------------------------------------------------------------------------------------------------------------------------------------------------------------------------------------------------------------------------|
| <b>Design</b>                                                                               | Describe survey design                   | √ This survey was designed and conducted among anesthesiologists in Shaanxi, China. The sample was a convenience sample.                                                                                                                                     |
| <b>IRB approval and informed consent process</b>                                            | IRB approval                             | √ This study was approved by the Research Ethics Committee of Plastic Surgery Hospital of Chinese Academy of Medical Science (2021/21).                                                                                                                      |
|                                                                                             | Informed consent                         | √ All participants obtained before completing the questionnaire.                                                                                                                                                                                             |
|                                                                                             | Data protection                          | √ All valid information was collected anonymously, only used for academic research.                                                                                                                                                                          |
| <b>Development and pre-testing</b>                                                          | Development and testing                  | √ The authors designed the study after thoroughly reviewing available literature and discussing it with some senior professors. The usability and technical functionality of the electronic questionnaire had been tested before fielding the questionnaire. |
| <b>Recruitment process and description of the sample having access to the questionnaire</b> | Open survey versus closed survey         | √ Open survey.                                                                                                                                                                                                                                               |
|                                                                                             | Contact mode                             | √ The initial contact with the potential participants was made on the Internet, including emails, QQ and WeChat software.                                                                                                                                    |
|                                                                                             | Advertising the survey                   | √ The chiefs of anesthesiology and their colleagues in Shaanxi province were asked to convey the survey.                                                                                                                                                     |
| <b>Survey administration</b>                                                                | Web/E-mail                               | √ The survey was posted on a Web site.                                                                                                                                                                                                                       |
|                                                                                             | Context                                  | √ WenJuanXing online platform ( <a href="https://www.wjx.cn">https://www.wjx.cn</a> ).                                                                                                                                                                       |
|                                                                                             | Mandatory/voluntary                      | √ Voluntary.                                                                                                                                                                                                                                                 |
|                                                                                             | Incentives                               | √ Non-monetary incentives.                                                                                                                                                                                                                                   |
|                                                                                             | Time/Date                                | √ March 1 to 31, 2021.                                                                                                                                                                                                                                       |
|                                                                                             | Randomization of items or questionnaires | √ WenJuanXing is user configured to randomize/alternate items.                                                                                                                                                                                               |
|                                                                                             | Adaptive questioning                     | √ Used in this study.                                                                                                                                                                                                                                        |
|                                                                                             | Number of items                          | √ 20 items.                                                                                                                                                                                                                                                  |
|                                                                                             | Number of screens (pages)                | √ 2 pages (WenJuanXing automatically captures).                                                                                                                                                                                                              |
|                                                                                             | Completeness check                       | √ Yes, WenJuanXing allows user to configure a completeness check based on Java Script.                                                                                                                                                                       |
|                                                                                             | Review step                              | √ Respondents could alter their responses before submission.                                                                                                                                                                                                 |

|                                                             |                                                                              |                                                                                                                                              |
|-------------------------------------------------------------|------------------------------------------------------------------------------|----------------------------------------------------------------------------------------------------------------------------------------------|
| <b>Response rates</b>                                       | Unique site visitor                                                          | -                                                                                                                                            |
|                                                             | View rate (Ratio unique site visitors/unique survey visitors)                | -                                                                                                                                            |
|                                                             | Participation rate (Ratio unique survey page visitors/agreed to participate) | -                                                                                                                                            |
|                                                             | Completion rate (Ratio agreed to participate/finished survey)                | √ 99.87%(796/795).                                                                                                                           |
| <b>Preventing multiple entries from the same individual</b> | Cookies used                                                                 | -                                                                                                                                            |
|                                                             | IP check                                                                     | √ The IP address of the client computer was used to identify potential duplicate entries from the same user.                                 |
|                                                             | Log file analysis                                                            | -                                                                                                                                            |
| <b>Analysis</b>                                             | Registration                                                                 | -                                                                                                                                            |
|                                                             | Handling of incomplete questionnaires                                        | √ Only completed questionnaires were analyzed, uncompleted questionnaires were excluded.                                                     |
|                                                             | Questionnaires submitted with an atypical timestamp                          | √ All collected questionnaires with a response time less than 150 seconds that was examined by the researchers would be excluded as invalid. |
|                                                             | Statistical correction                                                       | -                                                                                                                                            |

---
